# Supplementary material for: High-precision MC-ICP-MS measurements of Cd isotopes using a novel double spike method without Sn isobaric interference
Source: Royal Society of Chemistry journal article supplement (doi:10.1039/d4ja00357h), 2024-01-01
Supplement: d4ja00357h1.xlsx [file d4ja00357h1.xlsx]

## Sheet: Table S1
Table S1. Geochemical reference materials
Sample	Description	Cd (μg g-1)
BCR-2	Columbia River basalt sampled near Portland, Oregon	0.18 (0.69)
SGR-1b	Green River shale from the Mahogany Zone of the Green River Formation	0.91
NOD-A-1	Manganese nodule collected from the Atlantic Ocean along the Blake Plateau	6.13
NOD-P-1	Manganese nodule from the Pacific Ocean	17.49
NIST 2711a	Soil collected from the upper 10–12 cm of an agricultural field located near a site formerly used by a smelting plant, in east Helena, Montana.	45.04
GSD-7a	Stream sediment from Kaiyuan lead-zinc mining area, Liaoning	5.18

## Sheet: Table S2
Table S2. Cup configuration and isobaric and major molecular interferences for Cd isotope measurement with MC-ICP-MS
Faraday Cup or IC counting	IC5		H9	H8	H7		H6		H5	H4	H3	H2	H1	C	L1	L2	L3	L4	L5	IC0	IC1	IC2		IC3	L6	IC4
Mass					118		116		114	113	112	111	110	109	108	107	106	105	104
Cd isotopes							116Cd		114Cd	113Cd	112Cd	111Cd	110Cd		108Cd		106Cd
Isobaric interferences					118Sn		116Sn		114Sn	113In	112Sn		110Pd	109Ag	108Pd	107Ag	106Pd	105Pd	104Pd
Argide interferences (Guo et al. (2022))							80Se36Ar		78Se36Ar	77Se36Ar	76Ge36Ar	75As36Ar	74Ge36Ar		72Ge36Ar	71Ga36Ar	70Zn36Ar
							80Kr36Ar		78Kr36Ar	75As38Ar	76Se36Ar	73Ge38Ar	74Se36Ar		70Ge38Ar	69Ga38Ar	70Ge36Ar
							78Se38Ar		76Ge38Ar	73Ge40Ar	74Ge38Ar	71Ga40Ar	72Ge38Ar		70Zn38Ar	67Zn40Ar	68Zn38Ar
							78Kr38Ar		76Se38Ar		74Se38Ar		70Ge40Ar		68Zn40Ar		66Zn40Ar
							76Ge40Ar		74Ge40Ar		72Ge40Ar		70Zn40Ar
							76Se40Ar		74Se40Ar
Oxide interferences (Guo et al. (2022))							100Mo16O		98Mo16O	97Mo16O	96Zr16O	95Mo16O	94Zr16O		92Zr16O	91Zr16O	90Zr16O
							100Ru16O		98Ru16O	96Zr17O	96Mo16O	94Zr17O	94Mo16O		92Mo16O	90Zr17O	89Y17O
							99Ru17O		97Mo17O	96Mo17O	96Ru16O	94Mo17O	93Nb17O		91Zr17O	89Y18O	88Sr18O
							98Mo18O		96Zr18O	96Ru17O	95Mo17O	93Nb18O	92Zr18O		90Zr18O
							98Ru18O		96Mo18O	95Mo18O	94Zr18O		92Mo18O
									96Ru18O		94Mo18O

## Sheet: Table S3
Table S3. Measured δ114/110Cd of NIST 3108 for different pDS
pDS	δ114/110Cd	2SD
0.0367398	-1.84	0.13
0.069802	-0.92	0.1
0.0994172	-0.65	0.01
0.113616	-0.6	0.06
0.125771	-0.57	0.08
0.138909	-0.44	0.01
0.239103	-0.17	0.02
0.320091	-0.07	0.05
0.382267	-0.03	0.01
0.434292	0.01	0.03
0.442061	0	0.06
0.471144	0.01	0.04
0.476361	-0.01	0.06
0.506584	0	0.02
0.59677	-0.0025	0.047
0.636583	-0.0045	0.067
0.668655	-0.004	0.038
0.704095	0.007	0.07
0.731903	0.0395	0.009
0.780625	0.0375	0.065
0.788469	0.042	0.008

## Sheet: Table S4
Table S4. δ114/110Cd values of NIST 3108 diluted in different molarities of HNO3 relative to 100 ppb NIST 3108 in 0.1 mol l-1 HNO3
molarities of HNO3 (mol l-1)	δ114/110Cd	2SD
0.01	-0.0215	0.029
0.025	-0.0305	0.015
0.05	0.0095	0.023
0.075	-0.017	0.02
0.2	-0.0325	0.015
0.3	-0.022	0.006
0.4	-0.0165	0.049
0.5	-0.021	0.034

## Sheet: Table S5
Table S5. δ114/110Cd of NIST 3108 with different Cd concentrations relative to 100 ppb NIST 3108
Cd concentration (ppb)	δ114/110Cd	2SD
25	0.0385	0.017
50	0.0085	0.047
75	-0.0035	0.071
150	0.0105	0.049
200	0.05	0.024
250	-0.001	0.01
300	0.005	0.02

## Sheet: Table S6
Table S6. δ114/110Cd values of 100 ppb NIST 3108 Cd standard solutions doped with different amounts of Mo, Zn, Sn, Ni, Se, In, and Pd relative to the undoped 100 ppb NIST 3108 Cd standard solution
Matrix	Matrix/Cd	δ114/110Cd	2SD
Mo	0.001	-0.014	0.056
Mo	0.01	0.0305	0.037
Mo	0.05	0.021	0.036
Mo	0.1	0.035	0.048
Mo	0.5	0.0165	0.009
Mo	1	0.0335	0.051
Zn	0.001	0.047	0.048
Zn	0.01	0.018	0.058
Zn	0.05	0.05	0.018
Zn	0.1	0.051	0.002
Zn	0.5	0.0985	0.021
Zn	1	0.233	0.018
Sn	0.001	0.021	0.044
Sn	0.01	0.02	0.008
Sn	0.05	0.0295	0.047
Sn	0.1	0.009	0.036
Sn	0.5	0.0095	0.031
Sn	1	-0.0015	0.023
Sn	1.25	0.0259313	0.00407787
Sn	1.5	-0.0244294	0.0479969
Sn	1.75	-0.0187183	0.0609882
Sn	2	-0.00273082	0.0257627
Sn	2.25	0.00852968	0.0434592
Sn	2.5	-0.0102358	0.0631997
Ni	0.001	0.016	0.014
Ni	0.01	0.0005	0.029
Ni	0.05	-0.0065	0.005
Ni	0.1	0.0115	0.017
Ni	0.5	0.0075	0.015
Ni	1	0.033	0.058
Se	0.001	0.0095	0.001
Se	0.01	-0.0025	0.005
Se	0.05	0.031	0.082
Se	0.1	-0.001	0.034
Se	0.5	-0.013	0.034
Se	1	-0.003	0.052
In	0.001	0.002	0.014
In	0.01	0.028	0.046
In	0.05	0.0435	0.015
In	0.1	0.112	0.098
In	0.5	0.3725	0.001
In	1	0.719	0.02
Pd	1e-05	-0.00850062	0.0113518
Pd	5e-05	0.0435595	0.0627041
Pd	0.0001	-0.000952289	0.0512056
Pd	0.0005	-0.0164922	0.0385783
Pd	0.001	-0.189988	0.0826493
Pd	0.01	-0.184768	0.0338776
Pd	0.05	-6.90919	0.0368602

## Sheet: Table S7
Table S7. Summary of Cd separation procedures for Cd isotopes measurement by MC-ICPMS in this paper and literatures
Column	Reagent	Total volume (ml)	Sample	Reference
3 mL AG MP-1M (100–200 mesh)	HCl, H2O	64	Geological samples	This paper
Column Ⅰ: 2 mL AG 1-X8 resin (100–200 mesh) Column Ⅱ: 120 μL Eichrom TRU Spec resin	HCl, HNO3, HBr	98.6	Geological materials and meteorites	Wombacher et al. (2003)
Column Ⅰ: 200 μL AG 1-X8 (200–400 mesh) Column Ⅱ: 200 μL Eichrom TRU Resin (200–400 mesh)	HCl, HNO3, HBr	11.7	Ferromanganese crusts	Murphy et al. (2016)
Column Ⅰ: 2.8mL AG MP-1M (100–200 mesh) Column Ⅱ: 2.8mL AG MP-1M (100–200 mesh)	HCl, HNO3, HF, H2O	184	Geological samples	Tan et al. (2020)
Column Ⅰ: 2 mL AG MP-1M (100–200 mesh) Column Ⅱ: 100 μL Eichrom TRU spec resin	HCl	66	Geological samples	Peng et al. (2021)
Column Ⅰ: 2 mL AG MP-1M (100–200 mesh) Column Ⅱ: 0.25 mL BPHA resin	HCl	57.45	Geological samples	Zhong et al. (2023a)
Column Ⅰ: 2 mL AG 1-X8 (100–200 mesh) Column Ⅱ: 160 μL AG 1-X8 (100–200 mesh)	HCl, HNO3, HBr	96.45	Geological samples	Friebel et al. (2019)
3 mL AG MP-1M (100–200 mesh)	HCl	88	Environmental samples	Dong et al. (2022)
2.5 mL AG MP-1M resin (100–200 mesh)	HCl	87	Geological samples	Li et al. (2018)
2 mL AG MP-1M resin (100–200 mesh)	HCl, HNO3, HBr	98	Geological samples	Li et al. (2022)
2 mL AG 1-X8 (100–200 mesh)	HCl, HNO3, HBr	71	Soil and Rock	Liu et al. (2020)
1.9 mL AG MP-1M (100–200 mesh)	HCl, HF	67	Geological samples	Zhong et al. (2023b)
